# Supplementary material for: Designing a new class of excess electron compounds with unique electronic structures and extremely large non-linear optical responses
Source: Royal Society of Chemistry journal article supplement (doi:10.1039/d0nj00896f), 2020-01-01
Supplement: d0nj00896f1.pdf [file d0nj00896f1.pdf]

The supplementary information for

**Designing a new class of excess electron compounds with unique  
electronic structures and extremely large nonlinear optical responses**

Xiang-Hui Li<sup>b</sup>, Li Zhang<sup>a</sup>, Xiao-Ling Zhang<sup>a</sup>, Bi-Lian Ni<sup>a</sup>, Chun-Yan Li<sup>a,\*</sup>, Wei-Ming Sun<sup>a,\*</sup>

<sup>a</sup>*Fujian Key Laboratory of Drug Target Discovery and Structural and Functional Research, The School of Pharmacy, Fujian Medical University, Fuzhou 350108, People's Republic of China.*

*E-mail: sunwm@fjmu.edu.cn (W.-M. Sun); cyli65@126.com (C.-Y. Li)*

<sup>b</sup>*Medical Technology and Engineering College, Fujian Medical University, Fuzhou 350004, Fujian, People's Republic of China*

## Table of Contents

|                                                                                                                                                                     |            |
|---------------------------------------------------------------------------------------------------------------------------------------------------------------------|------------|
| <b>1. Tables</b> .....                                                                                                                                              | <b>S3</b>  |
| <b>Table S1.</b> The basis set test for structural optimization by sampling Ca- <b>1</b> -Li.....                                                                   | <b>S3</b>  |
| <b>Table S2.</b> The basis set test for calculating $\mu_0$ , $\alpha_0$ , and $\beta_0$ by sampling Ca- <b>1</b> -Li.....                                          | <b>S4</b>  |
| <b>Table S3.</b> Selected geometric parameters, NPA charges, VIE values, and complexation energies of M- <b>1</b> -M' (M = Be, Mg, and Ca; M' = Li, Na, and K)..... | <b>S5</b>  |
| <b>Table S4.</b> Frequency-dependant first hyperpolarizabilities of the Ca <sup>+</sup> - <b>1</b> -M <sup>-</sup> .....                                            | <b>S6</b>  |
| <b>2. Figures</b> .....                                                                                                                                             | <b>S7</b>  |
| <b>Figure S1</b> ELF isosurface picture with the critical points (CP) for Ca <sup>+</sup> - <b>1</b> -M <sup>-</sup> .....                                          | <b>S7</b>  |
| <b>Figure S2</b> Isosurface maps of $\beta_{zzz}$ density $-z\rho_{zz}^2(\mathbf{r})$ for Ca <sup>+</sup> - <b>1</b> -M <sup>-</sup> .....                          | <b>S8</b>  |
| <b>Figure S3</b> Frequency-dependent first hyperpolarizability of Ca <sup>+</sup> - <b>1</b> -M <sup>-</sup> .....                                                  | <b>S9</b>  |
| <b>3. Cartesian coordinates</b> .....                                                                                                                               | <b>S10</b> |

## 1. Tables

**Table S1** The symmetry, the distance between Ca and Li ( $d_{\text{Ca-Li}}$ , in Å), Li<sup>+</sup>-F distance ( $d_{\text{Ca-F}}$ , in Å), and distance between Li<sup>-</sup> and H ( $d_{\text{Li-H}}$ , in Å) for **Ca-1-Li** optimized by using M06-2X method and different basis sets.

| Basis sets               | Symmetry | $d_{\text{Ca-Li}}$ | $D_{\text{Ca-F}}$ | $D_{\text{Li-H}}$ |
|--------------------------|----------|--------------------|-------------------|-------------------|
| 6-31G                    | $C_{3v}$ | 7.481              | 2.392             | 2.952             |
| 6-31G(d)                 | $C_{3v}$ | 7.986              | 2.574             | 3.300             |
| 6-31+G(d)                | $C_{3v}$ | 8.225              | 2.743             | 3.345             |
| 6-31+G(d,p)              | $C_{3v}$ | 8.224              | 2.742             | 3.344             |
| 6-31++G(d,p)             | $C_{3v}$ | 8.224              | 2.742             | 3.344             |
| 6-311+G(d)               | $C_{3v}$ | 7.511              | 2.379             | 3.047             |
| <b>6-311++G(d,p)</b>     | $C_{3v}$ | <b>7.510</b>       | <b>2.377</b>      | <b>3.045</b>      |
| 6-311++G(2d,2p)          | $C_{3v}$ | 7.514              | 2.383             | 3.058             |
| <b>6-311++G(3df,3pd)</b> | $C_{3v}$ | <b>7.480</b>       | <b>2.371</b>      | <b>3.044</b>      |

**Table S2** The dipole moments ( $\mu_0$ , in au), polarizabilities ( $\alpha_0$ , in au) first hyperpolarizabilities ( $\beta_0$ , in au) of Ca-1-Li calculated by using M06-2X method and different basis sets.

| Basis sets               | $\mu_0$      | $\alpha_0$ | $\beta_0$      |
|--------------------------|--------------|------------|----------------|
| 6-31g                    | 0.325        | 788        | 1263260        |
| 6-31G(d)                 | 0.254        | 979        | 889322         |
| 6-31+G(d)                | 0.643        | 878        | 1403449        |
| 6-31+G(d,p)              | 0.677        | 870        | 1394763        |
| 6-31++G(d,p)             | 0.707        | 850        | 1282893        |
| 6-311+G(d)               | 0.805        | 770        | 882447         |
| 6-311++G(d,p)            | 0.828        | 774        | 916498         |
| <b>6-311++G(2d,2p)</b>   | <b>0.764</b> | <b>830</b> | <b>993965</b>  |
| <b>6-311++G(3df,3pd)</b> | <b>0.818</b> | <b>841</b> | <b>1063915</b> |

**Table S3** Symmetries, distances between the nether M and axial F atoms ( $d_{M-F}$ , in Å), distances between the upper M' and axial H atoms ( $d_{M'-H}$ , in Å), distances between the M and M' atoms ( $d_{M-M'}$ , in Å), NPA charges on M ( $Q_M$ , in |e|) and M' ( $Q_{M'}$ , in |e|), VIE values (in eV), and complexation energies ( $E_c$ , in kcal/mol) of the M-1-M' (M = Be, Mg, and Ca; M' = Li, Na, and K) compounds.

| Complex | Symmetry | $d_{M-F}$ | $d_{M'-H}$ | $d_{M-M'}$ | $Q_M$  | $Q_{M'}$ | VIE   | $E_c$  |
|---------|----------|-----------|------------|------------|--------|----------|-------|--------|
| Be-1-Li | $C_{3v}$ | 3.124     | 3.451      | 8.754      | -0.005 | 0.029    | 6.110 | -1.59  |
| Be-1-Na | $C_{3v}$ | 3.136     | 3.402      | 8.712      | -0.007 | 0.027    | 5.893 | -2.19  |
| Be-1-K  | $C_{3v}$ | 3.132     | 3.608      | 8.929      | -0.007 | 0.056    | 5.007 | -2.83  |
| Mg-1-Li | $C_{3v}$ | 3.206     | 3.374      | 8.765      | 0.016  | 0.019    | 6.006 | -2.14  |
| Mg-1-Na | $C_{3v}$ | 3.156     | 3.344      | 8.673      | 0.042  | -0.010   | 5.862 | -2.92  |
| Mg-1-K  | $C_{3v}$ | 3.241     | 3.632      | 9.084      | -0.001 | 0.054    | 5.013 | -3.14  |
| Ca-1-Li | $C_{3v}$ | 2.377     | 3.045      | 7.510      | 0.604  | -0.282   | 5.058 | -14.22 |
| Ca-1-Na | $C_{3v}$ | 2.529     | 3.346      | 7.996      | 0.198  | -0.116   | 5.150 | -11.25 |
| Ca-1-K  | $C_{3v}$ | 2.568     | 3.673      | 8.393      | 0.146  | -0.047   | 4.753 | -10.59 |

**Table S4.** Frequency-dependant first hyperpolarizabilities  $\beta(-2\omega, \omega, \omega)$  and  $\beta(-\omega, \omega, 0)$  of the  $\text{Ca}^+ \mathbf{-1} \text{-M}^-$  ( $\text{M}' = \text{Li}, \text{Na}, \text{and K}$ ) compounds under the critical electric field  $F_z$  (in  $10^{-4}$  au).

| $\text{Ca}^+ \mathbf{-1} \text{-M}^-$  | $F_z$ | $\beta(-2\omega, \omega, \omega)$ |                    |                    | $\beta(-\omega, \omega, 0)$ |                    |                    |
|----------------------------------------|-------|-----------------------------------|--------------------|--------------------|-----------------------------|--------------------|--------------------|
|                                        |       | 0.000                             | 0.005              | 0.010              | 0.000                       | 0.005              | 0.010              |
| $\text{Ca}^+ \mathbf{-1} \text{-Li}^-$ | 0     | $5.97 \times 10^4$                | $7.01 \times 10^4$ | $7.87 \times 10^4$ | $5.97 \times 10^4$          | $7.65 \times 10^5$ | $6.96 \times 10^5$ |
| $\text{Ca}^+ \mathbf{-1} \text{-Na}^-$ | 2     | $4.72 \times 10^5$                | $5.73 \times 10^5$ | $1.03 \times 10^6$ | $4.72 \times 10^5$          | $8.33 \times 10^5$ | $1.91 \times 10^6$ |
| $\text{Ca}^+ \mathbf{-1} \text{-K}^-$  | 10    | $7.02 \times 10^5$                | $4.80 \times 10^5$ | $2.27 \times 10^6$ | $7.02 \times 10^5$          | 1230172            | $3.07 \times 10^5$ |

## 2. Figures

**Fig. S1** Electron localization function (ELF = 0.75) isosurface pictures with the critical points (CP) in the relevant basins for  $\text{Ca}^+ \mathbf{-1} \text{-M}^-$  ( $M = \text{Li}, \text{Na}, \text{and K}$ ) under the critical electric field  $F_z$ . The real space function values (density of all electrons, ELF, laplacian of the electron density  $\nabla^2\rho$ ) at the CP of ELF are also shown.

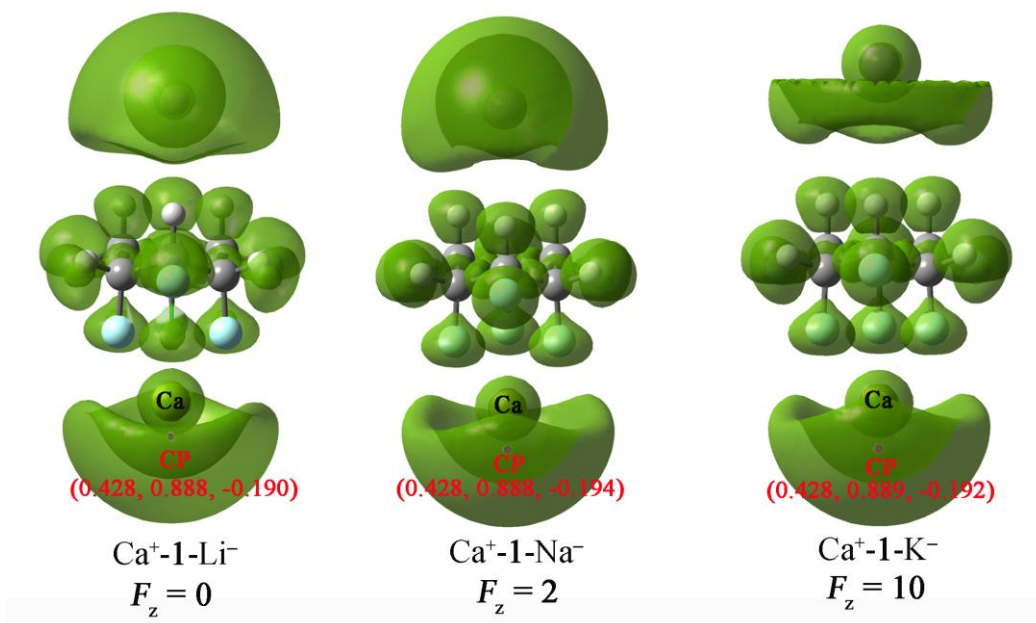

**Fig. S2** Isosurface maps of  $\beta_{zzz}$  density  $-z\rho_{zz}^2(\mathbf{r})$  for  $\text{Ca}^+\text{-1-M}^-$  ( $\text{M}' = \text{Li}, \text{Na}, \text{and K}$ ) under the critical electric field  $F_z$  with the same isovalue of 80.00, where green and blue surfaces denote positive and negative densities, respectively.

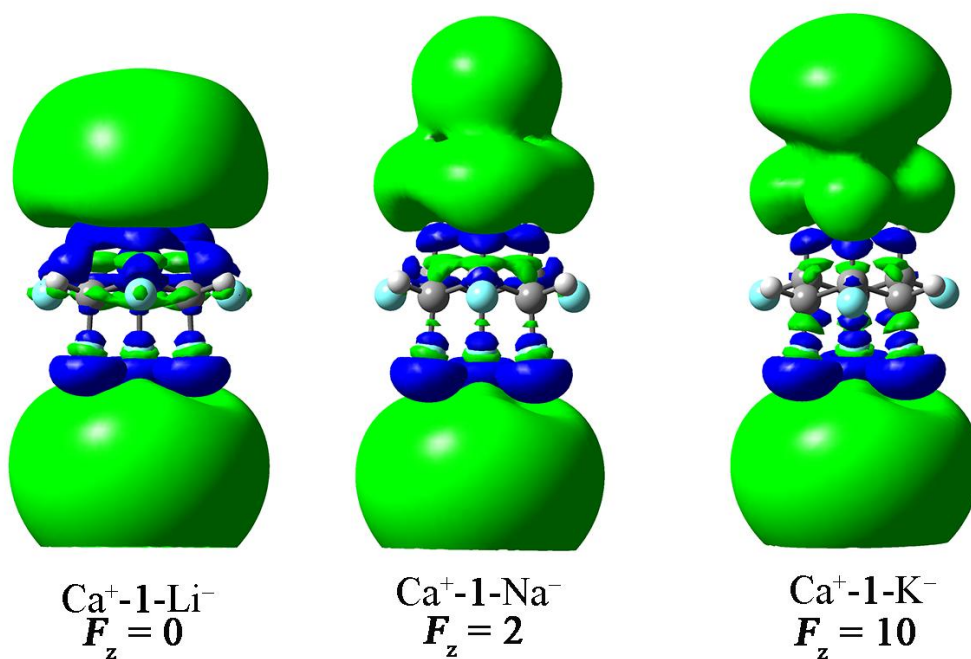



**Fig. S3** Frequency-dependent first hyperpolarizability  $\beta(-2\omega, \omega, \omega)$  and  $\beta(-\omega, \omega, 0)$  of  $\text{Ca}^+ \mathbf{-1} \text{-M}^-$  ( $\text{M}^- = \text{Li}^-, \text{Na}^-, \text{and K}^-$ ) under  $F_z$ .

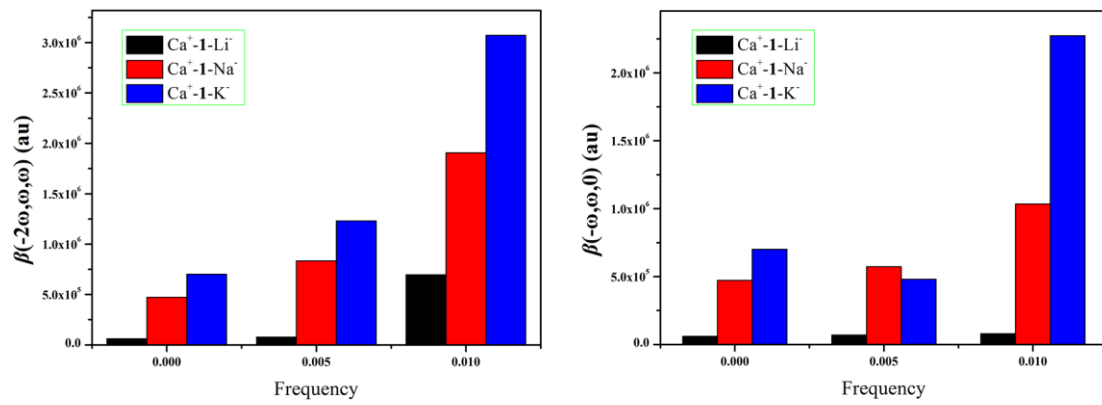

### 3. Cartesian coordinates

#### (1) The optimized structure of $\text{Ca}^+ \text{-1-Li}^-$ without $F_z$

|    |             |             |             |
|----|-------------|-------------|-------------|
| C  | 1.23096800  | 0.71070000  | -1.09287000 |
| C  | 0.00000000  | 1.44924700  | -0.63650100 |
| C  | -1.23096800 | 0.71070000  | -1.09287000 |
| C  | -1.25508500 | -0.72462400 | -0.63650100 |
| C  | 0.00000000  | -1.42140000 | -1.09287000 |
| C  | 1.25508500  | -0.72462400 | -0.63650100 |
| H  | 0.00000000  | 2.48140700  | -0.98800900 |
| H  | 1.21865800  | 0.70359300  | -2.20948000 |
| H  | -2.14896200 | -1.24070400 | -0.98800900 |
| H  | 0.00000000  | -1.40718500 | -2.20948000 |
| H  | 2.14896200  | -1.24070400 | -0.98800900 |
| H  | -1.21865800 | 0.70359300  | -2.20948000 |
| F  | -1.34070200 | -0.77405500 | 0.79633900  |
| F  | 0.00000000  | 1.54810900  | 0.79633900  |
| F  | 1.34070200  | -0.77405500 | 0.79633900  |
| F  | 2.36123400  | 1.36325900  | -0.66851200 |
| F  | 0.00000000  | -2.72651800 | -0.66851200 |
| F  | -2.36123400 | 1.36325900  | -0.66851200 |
| Li | 0.00000000  | 0.00000000  | -4.90967600 |
| Ca | 0.00000000  | 0.00000000  | 2.59994300  |

#### (2) The optimized structure of $\text{Ca}^+ \text{-1-Na}^-$ under $F_z = 2 \times 10^{-4}$ au

|    |             |             |             |
|----|-------------|-------------|-------------|
| C  | -1.23281000 | 0.70906500  | -0.78668300 |
| C  | -0.00039600 | 1.44832200  | -0.32984800 |
| C  | 1.23242600  | 0.70963200  | -0.78648000 |
| C  | 1.25577800  | -0.72651000 | -0.32650300 |
| C  | 0.00029700  | -1.42778400 | -0.78070900 |
| C  | -1.25556700 | -0.72708600 | -0.32667000 |
| H  | -0.00059800 | 2.47969000  | -0.68311200 |
| H  | -1.22739300 | 0.70544100  | -1.90058600 |
| H  | 2.14979900  | -1.24298600 | -0.67664900 |
| H  | 0.00038500  | -1.43005400 | -1.89427400 |
| H  | -2.14930900 | -1.24397900 | -0.67691000 |
| H  | 1.22718900  | 0.70601300  | -1.90039500 |
| F  | 1.33817100  | -0.77013000 | 1.10290900  |
| F  | -0.00054900 | 1.54545300  | 1.09926200  |
| F  | -1.33811000 | -0.77069800 | 1.10272300  |
| F  | -2.36248500 | 1.36044100  | -0.35985000 |
| F  | 0.00056900  | -2.72831300 | -0.34287500 |
| F  | 2.36174200  | 1.36151500  | -0.35947000 |
| Ca | -0.00008600 | 0.00274200  | 2.92788000  |
| Na | 0.00094700  | 0.03922700  | -4.78329000 |

**(3) The optimized structure of  $\text{Ca}^+ \text{-1-K}^-$  under  $F_z = 10 \times 10^{-4}$  au**

|    |             |             |             |
|----|-------------|-------------|-------------|
| C  | 0.00009500  | 1.41716500  | -0.44922100 |
| C  | 1.25590000  | 0.71965300  | 0.01059500  |
| C  | 1.23372400  | -0.72163700 | -0.43607900 |
| C  | 0.00000600  | -1.45570400 | 0.02797900  |
| C  | -1.23355900 | -0.72162500 | -0.43647300 |
| C  | -1.25586400 | 0.71966800  | 0.01019000  |
| H  | 2.14931200  | 1.23283800  | -0.34634300 |
| H  | 0.00025100  | 1.41642400  | -1.56209700 |
| H  | 0.00005800  | -2.49091900 | -0.31398800 |
| H  | -1.23475600 | -0.73149900 | -1.54889000 |
| H  | -2.14915500 | 1.23286000  | -0.34704500 |
| H  | 1.23527200  | -0.73153300 | -1.54848200 |
| F  | -0.00022000 | -1.53579800 | 1.45590900  |
| F  | 1.33899700  | 0.77604200  | 1.43730500  |
| F  | -1.33942300 | 0.77607600  | 1.43686400  |
| F  | 0.00003600  | 2.72081300  | -0.02124400 |
| F  | -2.36202300 | -1.36876900 | -0.00037900 |
| F  | 2.36204300  | -1.36878800 | 0.00038000  |
| Ca | -0.00060400 | 0.02526100  | 3.28125900  |
| K  | -0.00008900 | 0.08946900  | -4.96446000 |
